# Supplementary material for: Synthesis, Characterization, and Application of Dichloride (5,10,15,20-Tetraphenylporphyrinato) Antimony Functionalized Pectin Biopolymer to Methylene Blue Adsorption
Source: MDPI journal article supplement (doi:10.3390/polym15041030), 2023-02-19
Supplement: s1 [file s1]

Supplementary File

# Synthesis, Characterization, and Application of Dichloride (5,10,15,20-Tetraphenylporphyrinato) Antimony Functionalized Pectin Biopolymer to Methylene Blue Adsorption

Raoudha Soury <sup>1,\*</sup>, Munirah Sulaiman Othman Alhar <sup>1</sup> and Mahjoub Jabli <sup>2,\*</sup>

<sup>1</sup> Department of Chemistry, College of Science, University of Hail, Ha'il 81451, Saudi Arabia

<sup>2</sup> Department of Chemistry, College of Science Al-Zulfi, Majmaah University, Al-Majmaah 11952, Saudi Arabia

\* Correspondence: ra.soury@uoh.edu.sa (R.S.); m.jabli@mu.edu.sa (M.J.)

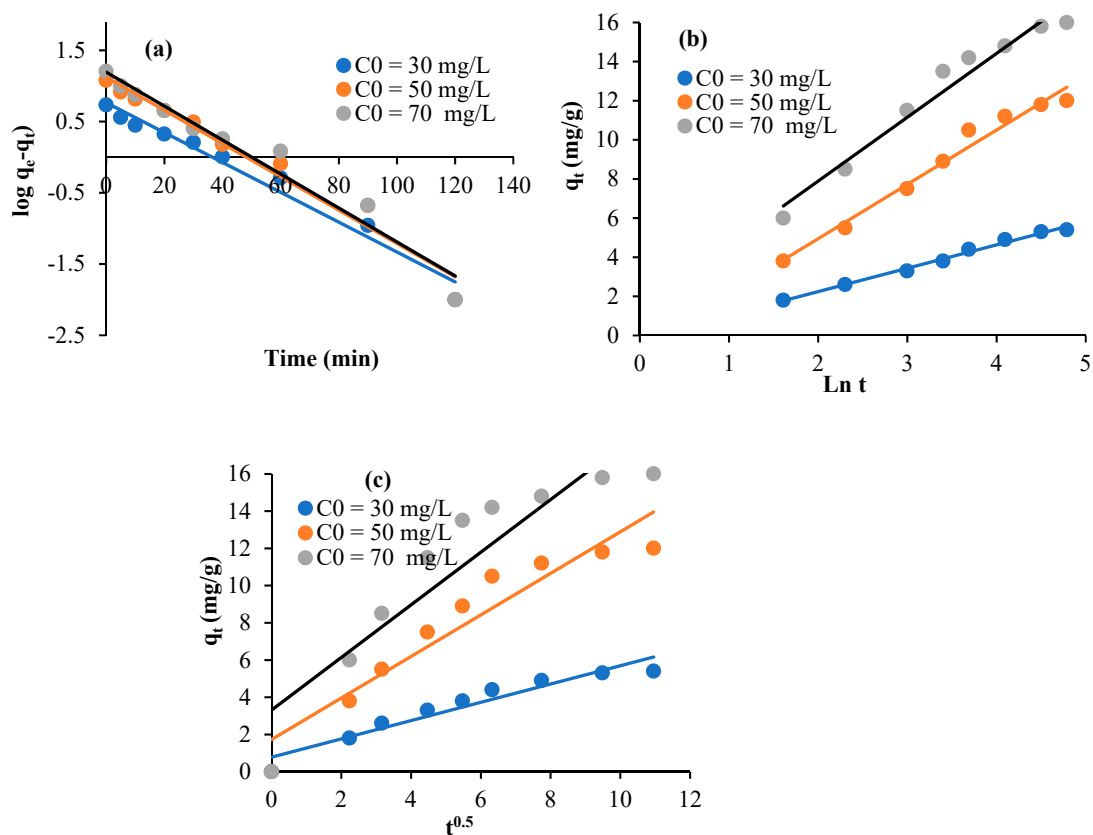

**Figure S1.** Kinetic plots for pectin beads: (a) First order, (b) Elovich, and (c) Intra-particle diffusion.

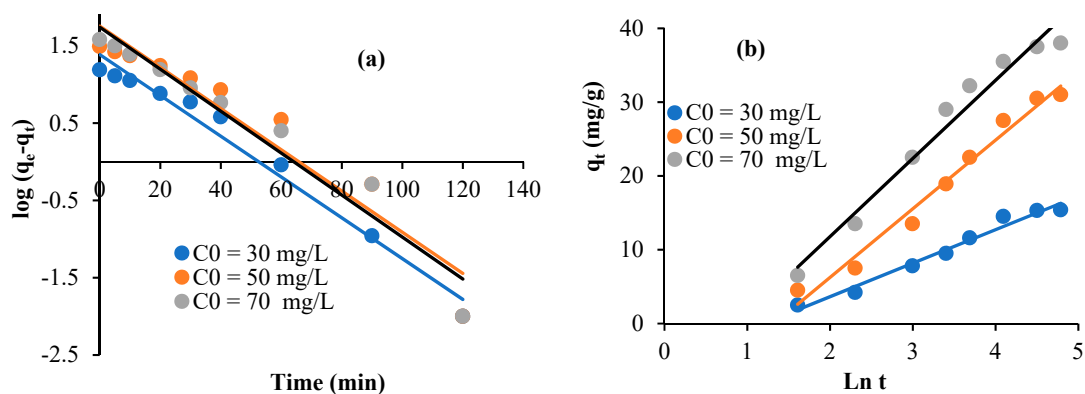

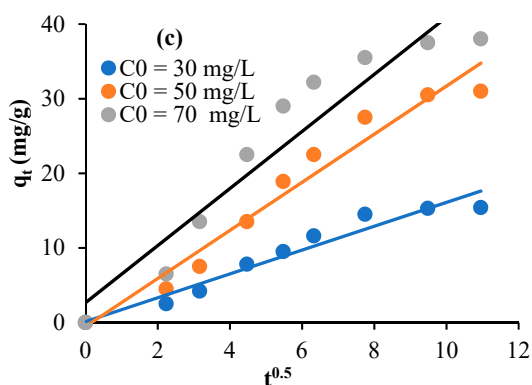

**Figure S2.** Kinetic plots for pectin-[Sb(TPP)Cl<sub>2</sub>] beads (1%): (a) First order, (b) Elovich, and (c) Intra-particle diffusion.

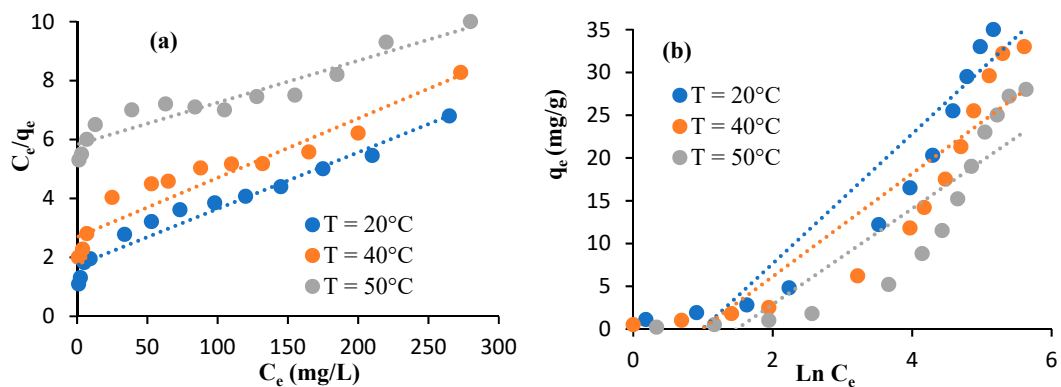

**Figure S3.** Isotherm data modeling for pectin beads: (a) Langmuir, and (b) Temkin.

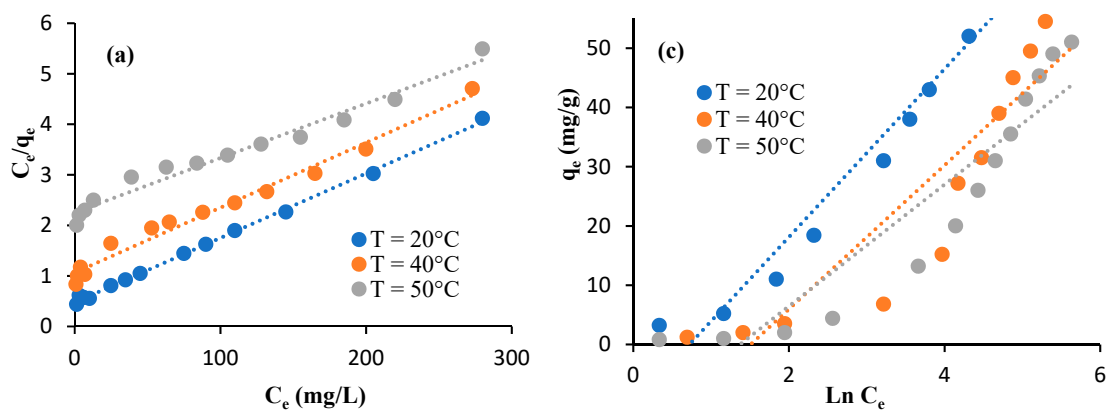

**Figure S4.** Isotherm data modeling for pectin-[Sb(TPP)Cl<sub>2</sub>] beads (1%): (a) Langmuir, and (b) Temkin.
